# Supplementary material for: Comparative Transcriptome Analysis Reveals the Mechanism Related to Fluazinam Stress of Panonychus citri (Acarina: Tetranychidae)
Source: MDPI journal article supplement (doi:10.3390/insects11110730), 2020-10-26
Supplement: s1 [file s1]

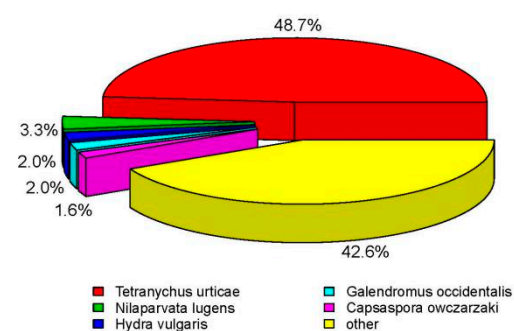

**Figure S1.** Unigene homology map (Species classification).

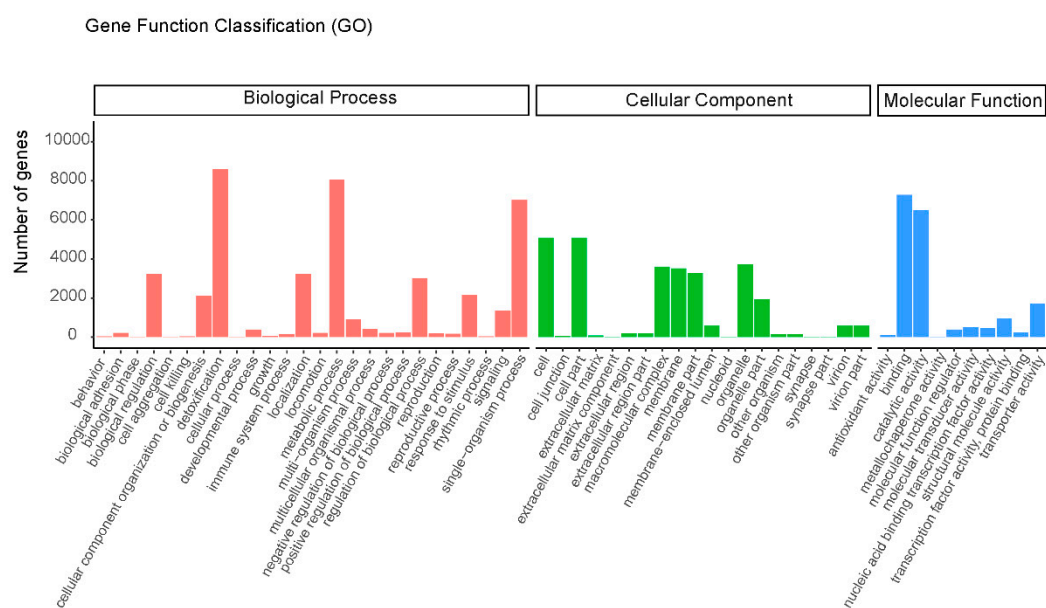

**Figure S2.** GO classification map

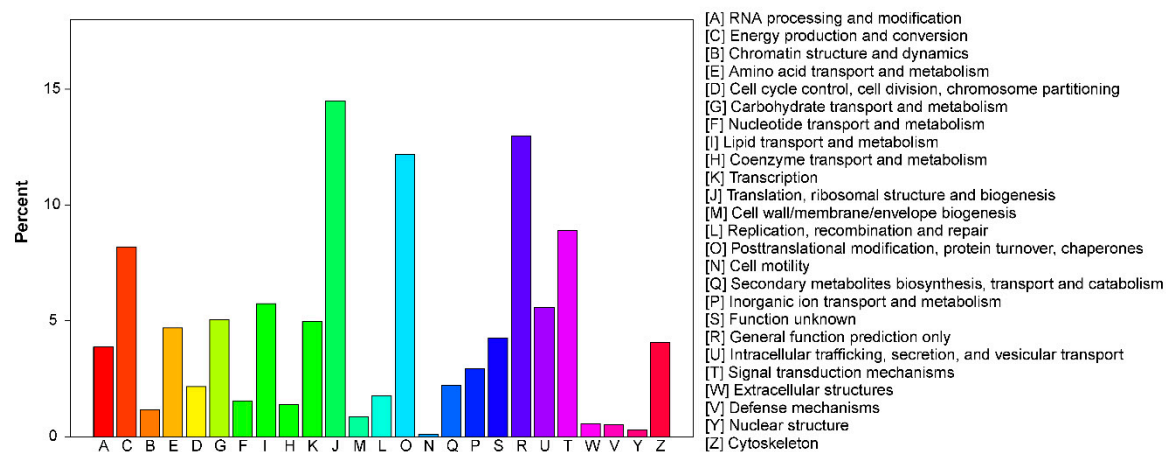

Figure S3. KOG classification map.
